# Supplementary material for: Transitional premonocytes emerge in the periphery for host defense against bacterial infections
Source: PubMed Central journal article supplement — Sci Adv. 2022 Mar 4;8(9):eabj4641. doi: 10.1126/sciadv.abj4641 (PMC8896792; doi:10.1126/sciadv.abj4641), 2022-03-04
Supplement: sciadv.abj4641_sm.pdf [file sciadv.abj4641_sm.pdf]

Supplementary Materials for  
**Transitional premonocytes emerge in the periphery for host defense against bacterial infections**

Ye Chean Teh, Ming Yao Chooi, Dehua Liu, Immanuel Kwok, Ghee Chuan Lai,  
Liyana Ayub Ow Yong, Melissa Ng, Jackson L. Y. Li, Yingrou Tan, Maximilien Evrard,  
Leonard Tan, Ka Hang Liong, Keith Leong, Chi Ching Goh, Andrew Y. J. Chan,  
Nurhidaya Binte Shadan, Chinmay Kumar Mantri, You Yi Hwang, Hui Cheng, Tao Cheng,  
Weimiao Yu, Hong Liang Tey, Anis Larbi, Ashley St John, Veronique Angeli, Christiane Ruedl,  
Bernett Lee, Florent Ginhoux, Swaine L. Chen, Lai Guan Ng\*, Jeak Ling Ding\*,  
Shu Zhen Chong\*

\*Corresponding author. Email: [ng\\_lai\\_guan@immunol.a-star.edu.sg](mailto:ng_lai_guan@immunol.a-star.edu.sg) (L.G.N.); [dbsdjl@nus.edu.sg](mailto:dbsdjl@nus.edu.sg) (J.L.D.);  
[chong\\_shu\\_zhen@immunol.a-star.edu.sg](mailto:chong_shu_zhen@immunol.a-star.edu.sg) (S.Z.C.)

Published 4 March 2022, *Sci. Adv.* **8**, eabj4641 (2022)  
DOI: 10.1126/sciadv.abj4641

**This PDF file includes:**

Figs. S1 to S7

**Figure S1**

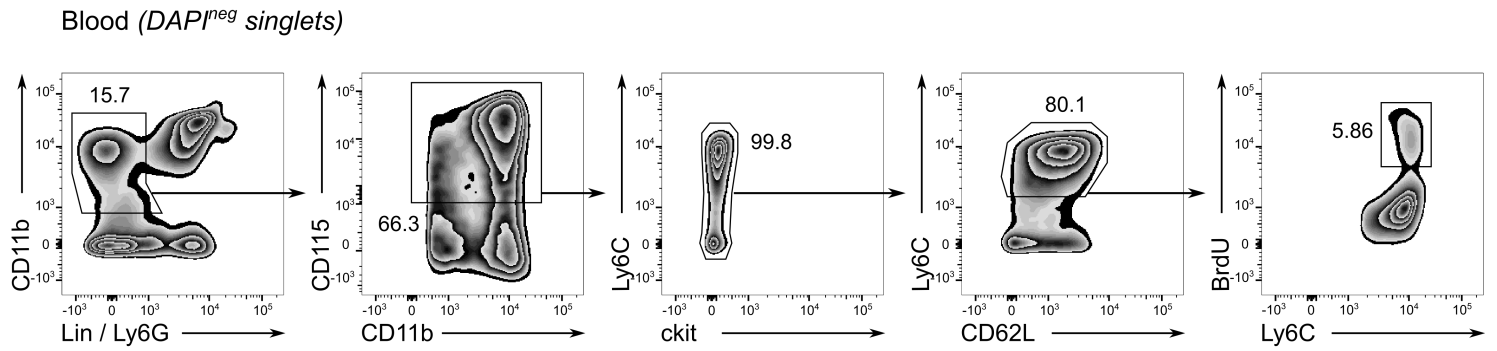

**Supplementary Figure S1: Gating strategy of blood proliferating Ly6C<sup>hi</sup> monocytes (pregated on DAPI<sup>neg</sup>/singlets).** Blood proliferating Ly6C<sup>hi</sup> monocytes are defined as Lin(B220/ CD90.2/ NK1.1)<sup>neg</sup> Ly6G<sup>neg</sup> CD11b<sup>pos</sup> CD115<sup>pos</sup> ckit<sup>neg</sup> Ly6C<sup>hi</sup> BrdU<sup>pos</sup> or Fucci<sup>pos</sup>. Flow cytometry plots are representative of one out of at least three independent experiments.

Figure S2

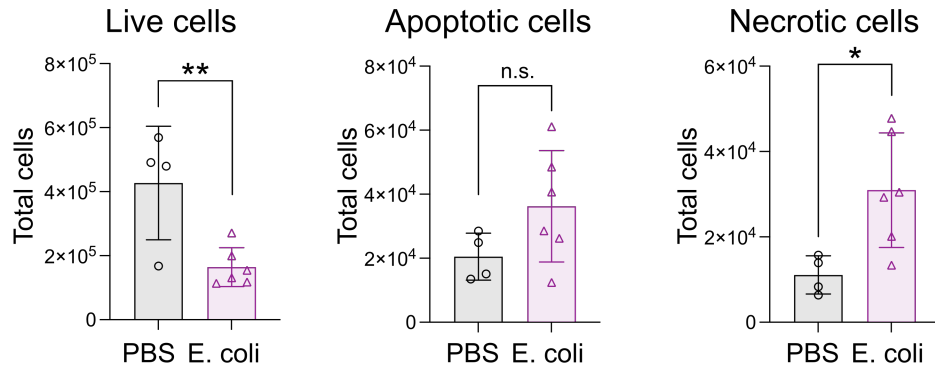

**Supplementary Figure S2: Cellular numbers of live, apoptotic, and necrotic peritoneal macrophages after *E.coli* infection.** The number of live, apoptotic, and necrotic peritoneal macrophages were quantified after 18 h of *E. coli* infection. Results are quantified as triplicates and representative of one out of three independent experiments. *n.s.* not significant, \* $P < 0.05$ , \*\* $P < 0.01$  (Student's t-test).

**Figure S3**

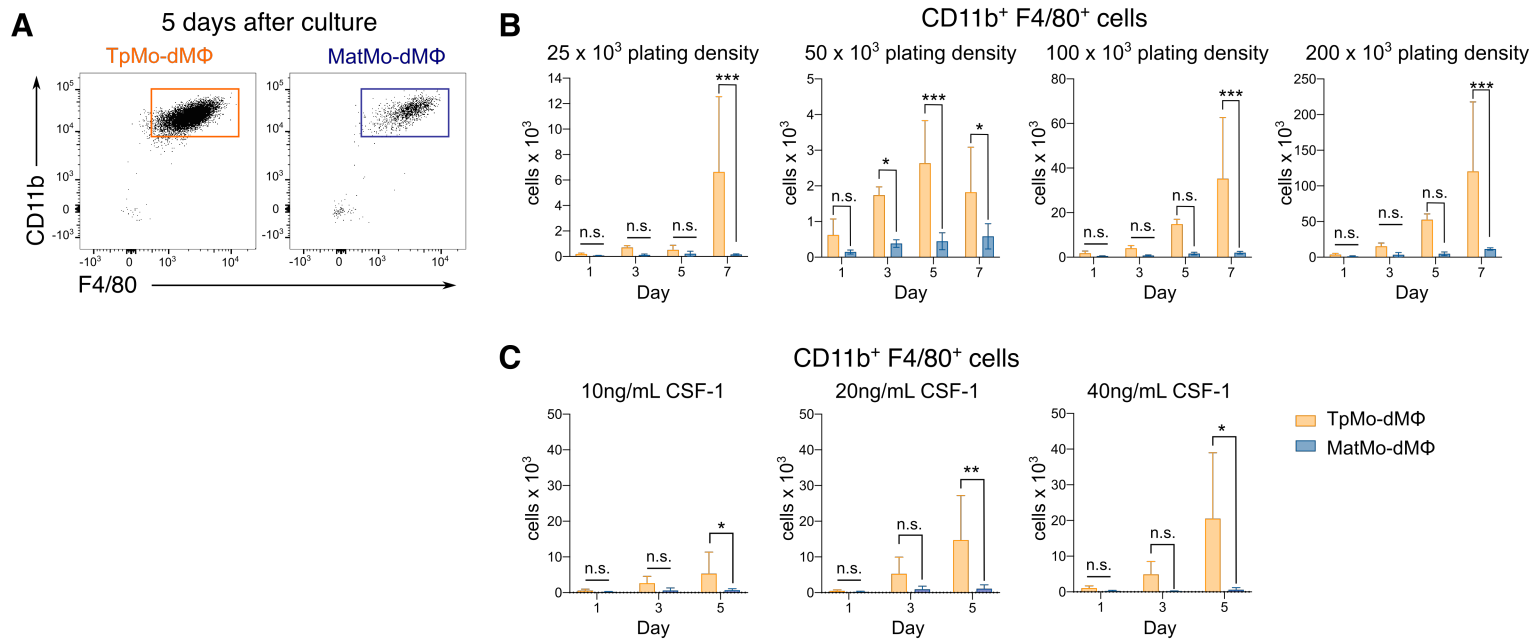

**Supplementary Figure S3: TpMos generated more macrophages than MatMos at titrated doses of CSF-1.** (A-C) Sorted TpMos or MatMos were cultured *in vitro* and macrophages were analyzed based on F4/80 and CD11b. (A) TpMo-derived macrophages (TpMo-dMΦs) and MatMo-derived macrophages (MatMo-dMΦs) harvested at indicated timepoints and plating densities (B) as well as doses of CSF-1 (C). Results are quantified as triplicates and representative of one out of three independent experiments. *n.s.* not significant, \**P*<0.05, \*\**P*<0.01, \*\*\**P*<0.001 (Student's t-test).

**Figure S4**

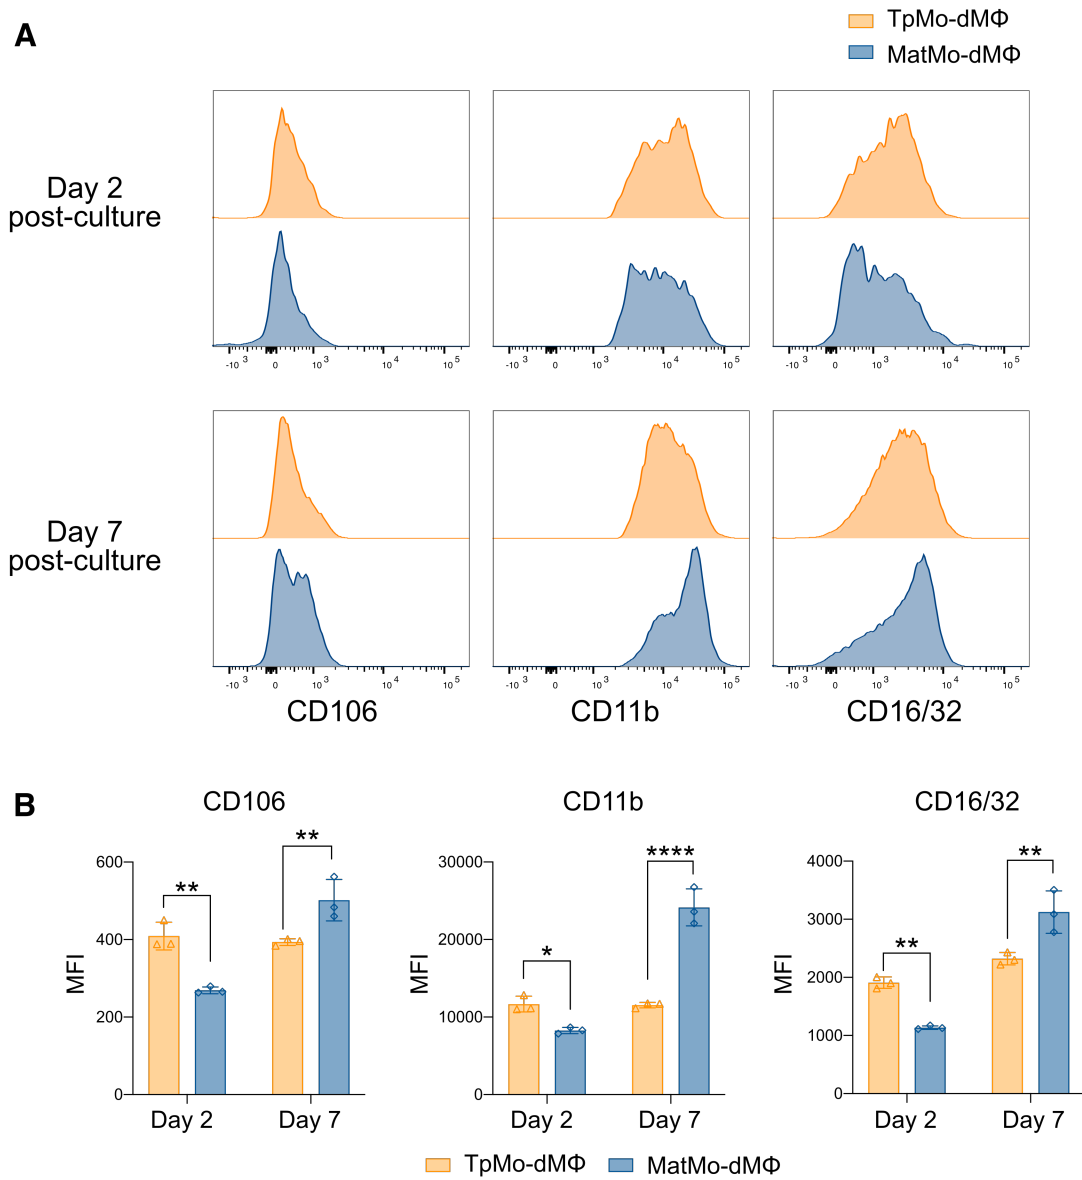

**Supplementary Figure S4: Phenotypic characteristics of TpMo-derived macrophages (TpMo-dMΦs) and MatMo-derived macrophages (MatMo-dMΦs).** (A-B) TpMos and MatMos were cultured with 20ng/ml of CSF-1 and analyzed at 2- or 7-days post-culture for surface markers (A) with median fluorescence intensity quantified (B). Results are expressed as mean  $\pm$  SD and representative of one out of three experiments. \* $P < 0.05$ , \*\* $P < 0.01$ , \*\*\*\* $P < 0.0001$  (Student's t-test).

Figure S5

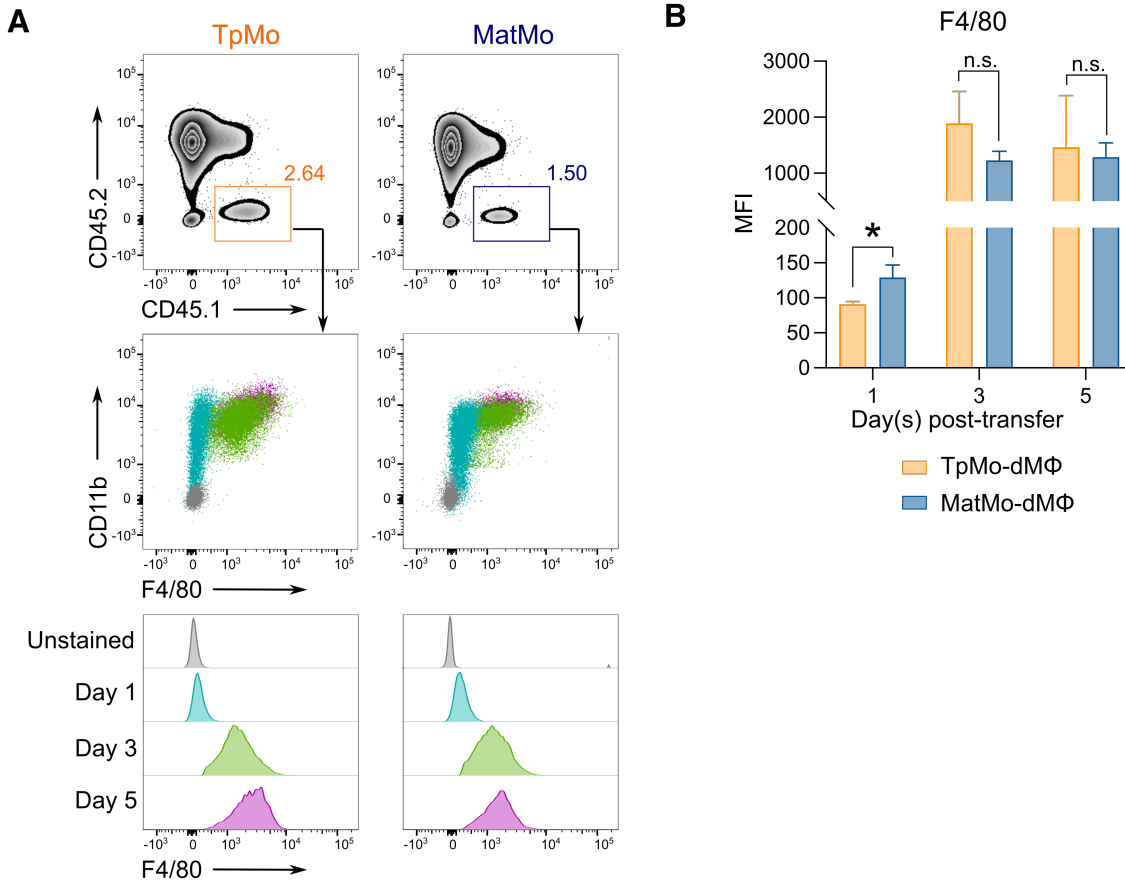

**Supplementary Figure S5: Expression of F4/80 on TpMo-derived macrophages (TpMo-dMΦs) and MatMo-derived macrophages (MatMo-dMΦs) *in vivo*.** (A-B) TpMos and MatMos from CD45.1 mice were sorted and adoptively transferred i.p. into CLP-induced CD45.2 mice. Analysis of peritoneal lavage of recipient mice for transferred cells were performed on Day 1, 3, and 5 after CLP for F4/80 expression (A) with median fluorescence intensity of F4/80 (B) quantified. Results are quantified as triplicates and representative of one out of three independent experiments. *n.s.* not significant,  $*P < 0.05$  (Student's t-test).

**Figure S6**

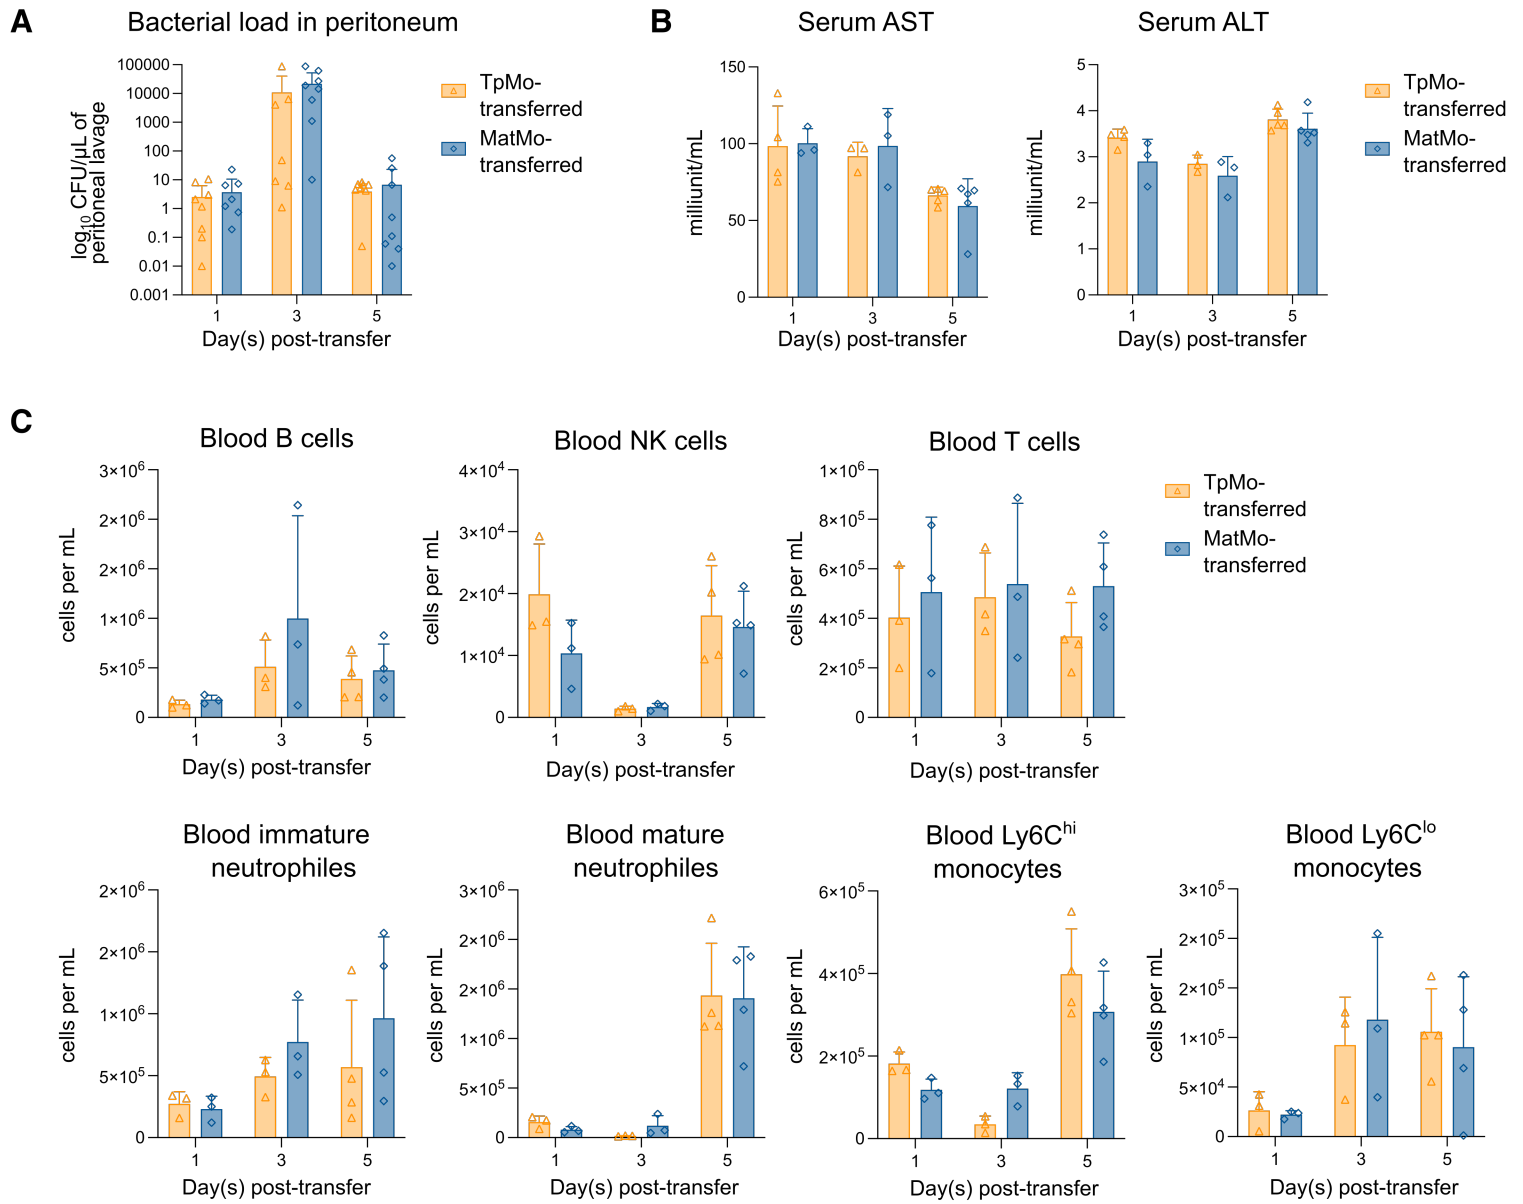

**Supplementary Figure S6: Assessment of sepsis parameters of mice that received TpMos and MatMos.** (A-C) TpMos and MatMos were sorted and adoptively transferred i.p. into CLP-induced septic mice. Recipient mice were harvested on Day 1, 3, and 5 after CLP to check for bacterial load in the peritoneum (A), serum AST/ALT levels (B), and blood leukocyte numbers (C).

**Figure S7**

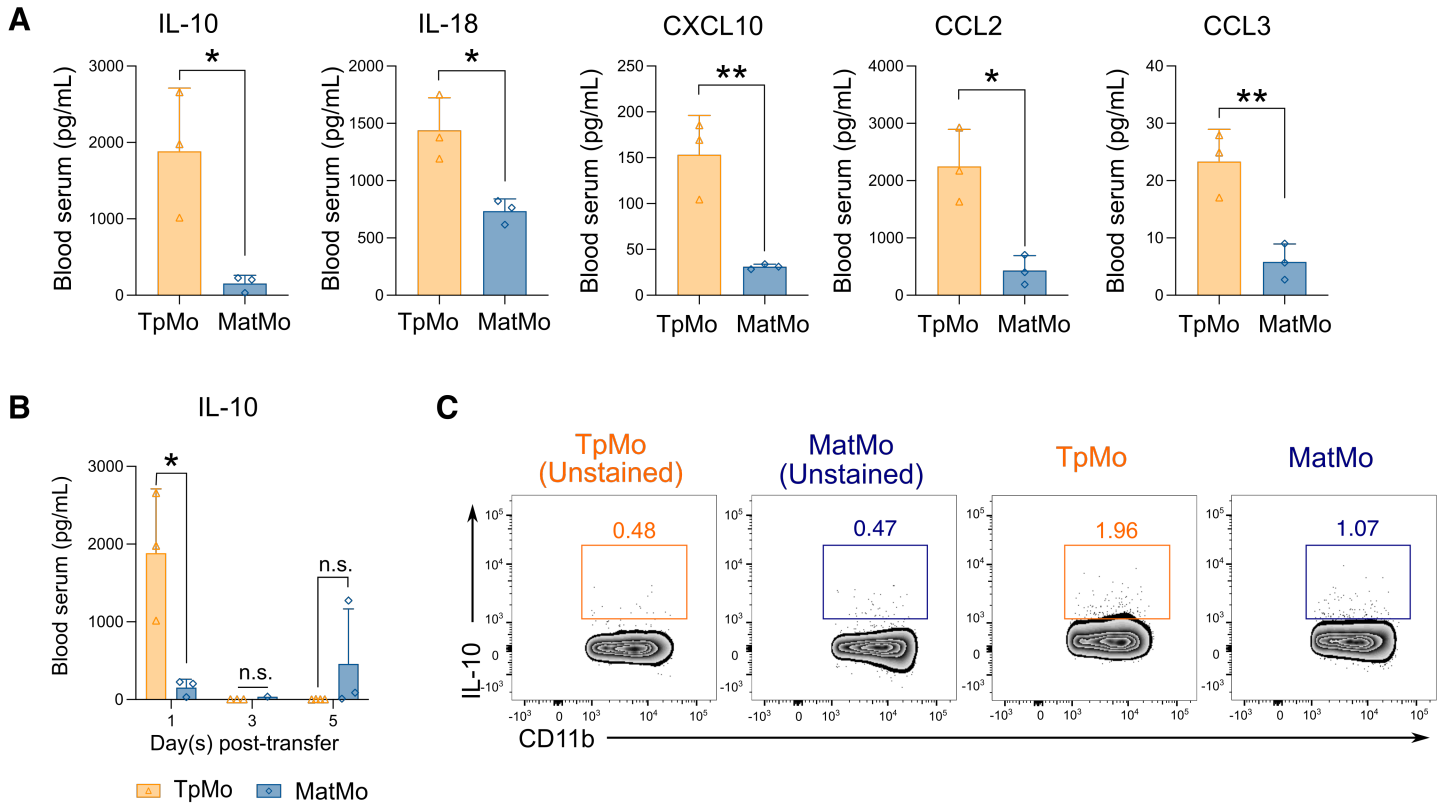

**Supplementary Figure S7: Serum cytokine and chemokine profile of septic mice after adoptive transfer of TpMos versus MatMos.** (A-B) TpMos and MatMos from CD45.1 mice were sorted and adoptively transferred i.p. into CLP-induced CD45.2 mice. LUMINEX analysis of blood serum of recipient mice were performed on Day 1, 3, and 5 after the adoptive transfer for cytokine and chemokine expressions. Results are quantified as triplicates and representative of one out of three independent experiments. *n.s.* not significant, \* $P < 0.05$ , \*\* $P < 0.01$  (Student's t-test). (C) Sorted TpMos and MatMos were analyzed for the expression of IL-10 via intracellular cytokine staining. Flow cytometry plots are representative of one out of at least three independent experiments.
